# Supplementary material
Source: PubMed Central journal article supplement (PMC2805032)
Supplement: NIHMS155584-supplement-2.pdf [file NIHMS155584-supplement-2.pdf]

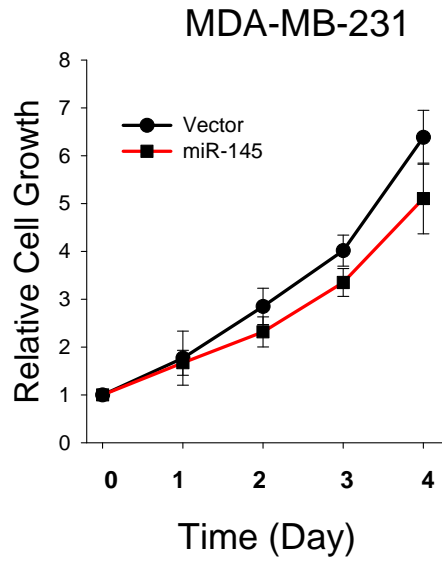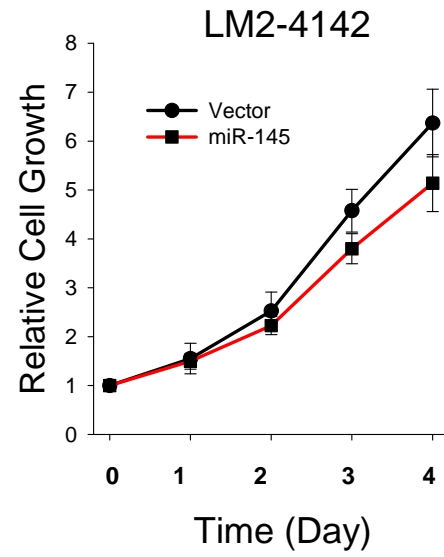

S-Fig. 1

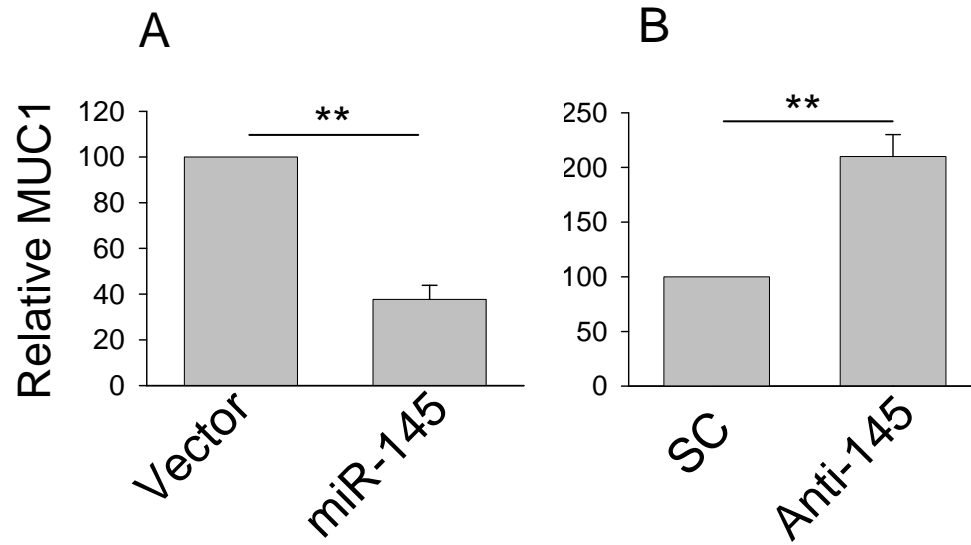

S-Fig. 2

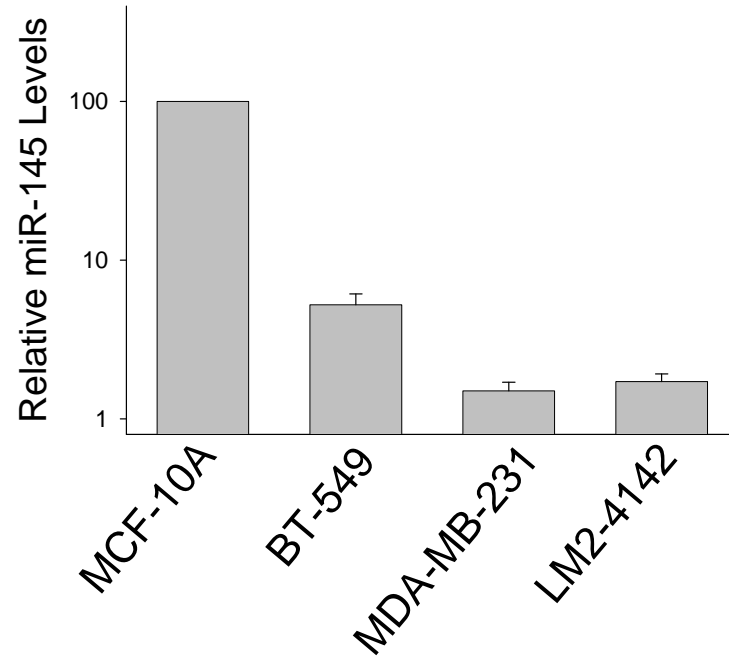

S-Fig. 3

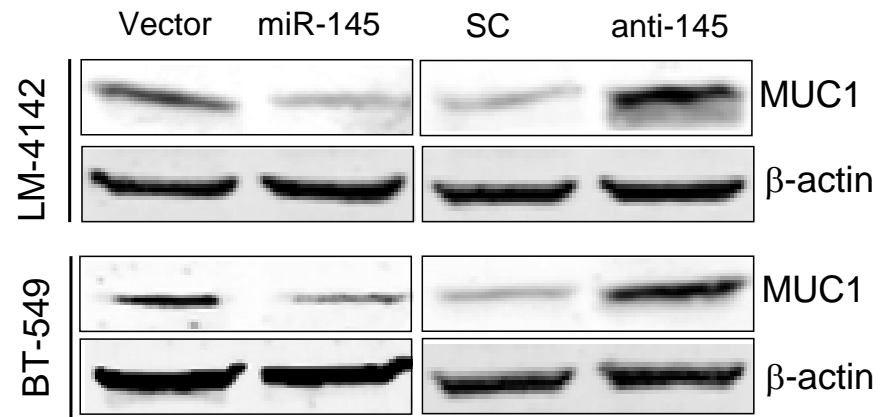

S-Fig. 4

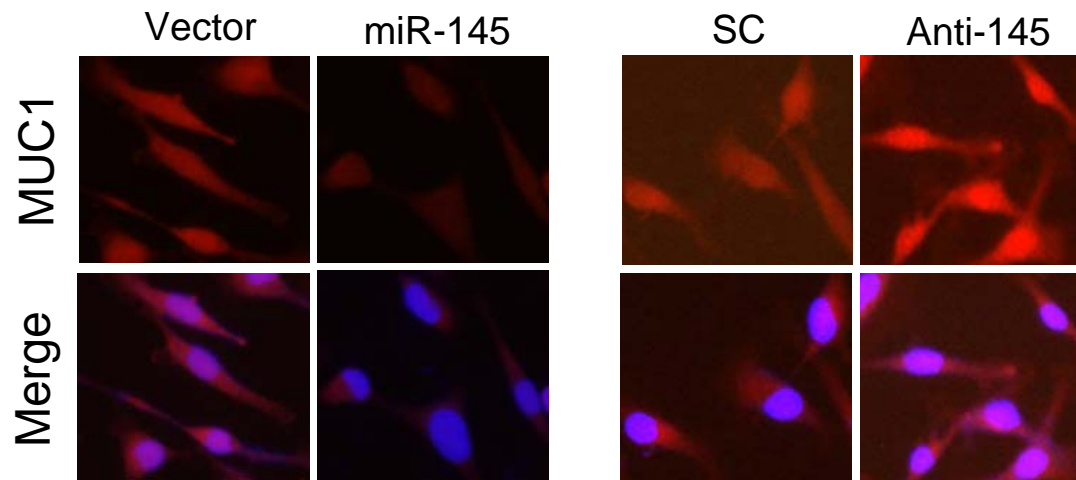

S-Fig. 5

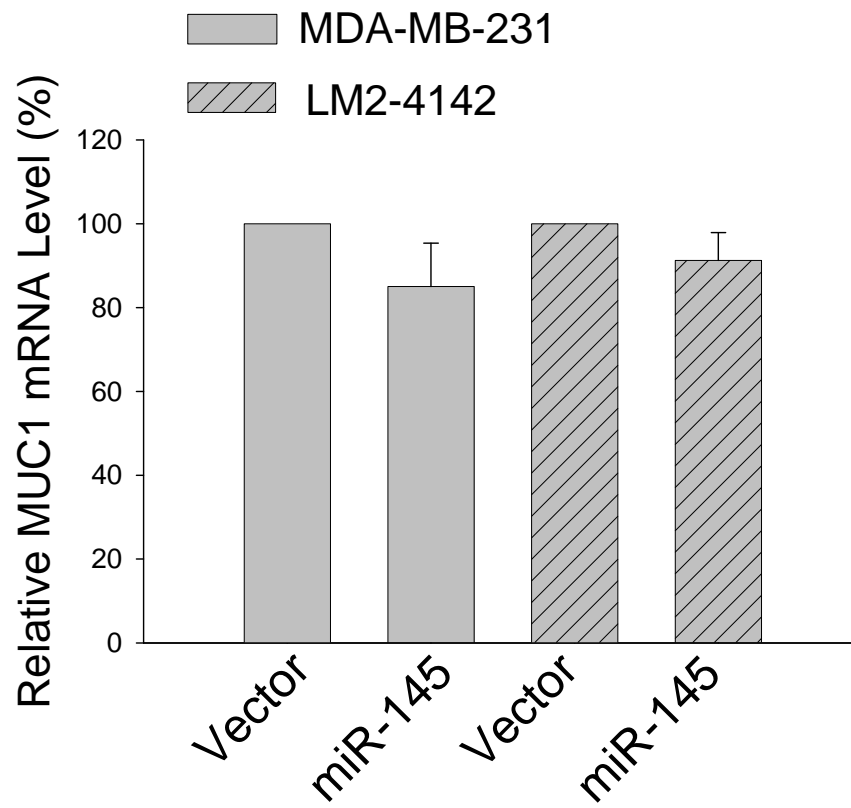

S-Fig. 6

**S-Table 1 Expression of MUC1 in breast tumors**

| <b>Metastatic status</b> | <b>Samples (N)</b> | <b>Level*</b>           | <b>%+++**</b> |
|--------------------------|--------------------|-------------------------|---------------|
| Non-metastatic<br>(M0)   | 45                 | 12 +++<br>22 ++<br>11 + | 27%           |
| Metastatic<br>(M1)       | 4                  | 3 +++<br>1 +            | 75%           |

\*+++ , high expression; ++ medium expression; and + low expression, as determined by IHC.

\*\* Although the difference of MUC1 expression appeared to be evident between non-metastatic vs metastatic tumors, p value was not significant for those samples at the +++ level (p=0.06) by Fisher's Exact Test presumably due to a small number of metastatic tumor samples.
